# Supplementary material for: Genetic Predisposition to SARS-CoV-2 Infection: Cytokine Polymorphism and Disease Transmission within Households
Source: MDPI journal article supplement (doi:10.3390/biology12111385), 2023-10-30
Supplement: s1 [file s1]

# Supplement

## Genetic Predisposition to SARS-CoV-2 Infection: Cytokine Polymorphism and Disease Transmission within Households

Marius Saal, Henry Loeffler-Wirth, Thomas Gruenewald, Ilias Doxiadis and Claudia Lehmann

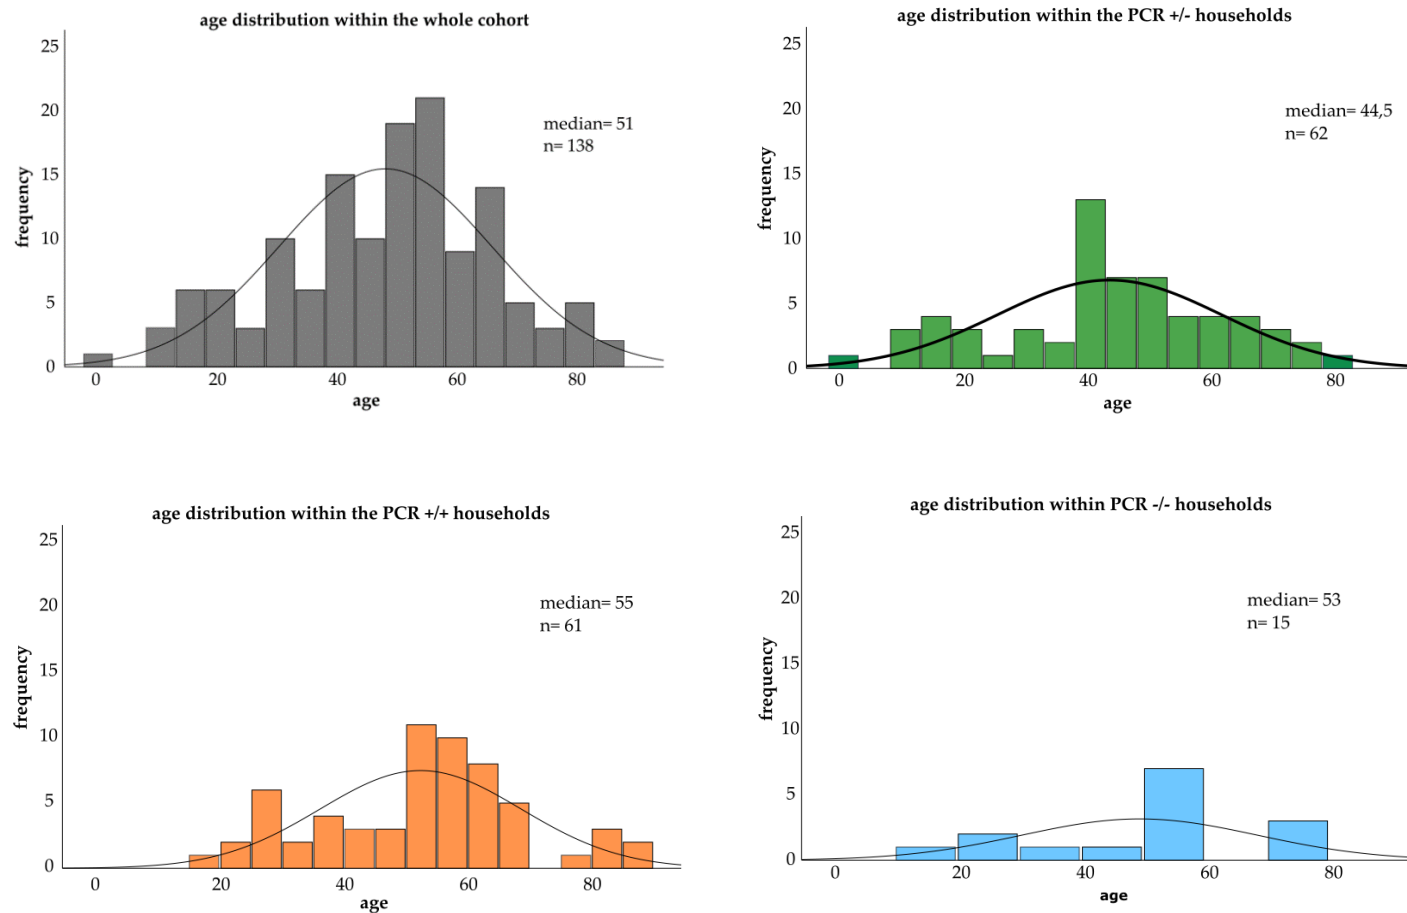

**Figure S1.** Histogram of age distribution of the different PCR household groups.

**Table S1.** Cytokine polymorphism in gene expression levels in various populations. *Source: [www.allelefreqencies.net/default.asp](http://www.allelefreqencies.net/default.asp)*

| Cytokine region                    | Polymorphism | Gene expression level                          | Saxon population% | Germany % | Brazil %  | England % | Greece%   | Portugal Center % | USA%      | Japan% | South Africa% | Zimbabwe% |
|------------------------------------|--------------|------------------------------------------------|-------------------|-----------|-----------|-----------|-----------|-------------------|-----------|--------|---------------|-----------|
| TNF- $\alpha$ promoter -308G       | G/G          | low                                            | 76                | 70.7-73.0 | 71.0-80.0 | 60.5-76.8 | 68.0-86.0 | 65.0              | 65.7-81.0 | 96.7   | 62.8          | na        |
| TNF- $\alpha$ promoter -308A -308G | G/A          | high                                           | 23                | 24.3-28.5 | 18.0-27.0 | 20.8-35.5 | 14.0-32.0 | 21.0              | 15.2-31.6 | 3.1    | 30.2          | na        |
| TNF- $\alpha$ promoter -308A       | A/A          | high                                           | 2                 | 0.5-2.7   | 2.0       | 2.4-16.0  | 0.0       | 14.0              | 1.1-3.8   | 0.2    | 7.0           | na        |
| IFN- $\gamma$ intron1 +874T        | T/T          | high                                           | 20                | na        | 5.0-18.0  | 17.9-21.0 | 25.6      | 18.8 Azores       | 0.0-25.4  | na     | na            | na        |
| IFN- $\gamma$ intron1 +874T +874A  | T/A          | intermediate                                   | 51                | na        | 48.0-54.0 | 48.2-56.7 | 47.4      | 50.4 Azores       | 26.7-57.2 | na     | na            | na        |
| IFN- $\gamma$ intron1 +874A        | A/A          | low                                            | 30                | na        | 31.0-47.0 | 25.0-31.1 | 26.9      | 30.8 Azores       | 21.9-66.7 | na     | na            | na        |
| IL-6 promoter -174G                | G/G          | high                                           | 30                | 31.0-38.7 | 49.3-72.0 | 30.2-43.4 | 51.3-65.0 | 43.0              | 26.7-93.3 | na     | 98.8          | 100.0     |
| IL-6 promoter -174C -174G          | G/C          | high                                           | 53                | 44.0-48.0 | 26.0-43.8 | 45.1-52.5 | 31.0-35.0 | 39.0              | 3.0-52.0  | na     | 1.2           | 0.0       |
| IL-6 promoter -174C                | C/C          | low                                            | 17                | 17.1-21.0 | 2.0-12.0  | 15.2-19.6 | 0.0-14.1  | 18.0              | 0.0-37.6  | na     | 0.0           | 0.0       |
| IL-10 promoter -1082A              | A/A          | low                                            | 27                | 24.5-35.4 | 39.0-44.4 | 20.6-28.0 | 37.0-42.0 | 36.0              | 16.0-51.4 | na     | 33.4          | na        |
| IL-10 promoter -1082G              | G/G          | high                                           | 24                | 17.3-28.8 | 10.7-19.0 | 25.6-49.9 | 10.0-20.5 | 12.0              | 4.3-32.0  | na     | 9.5           | na        |
| IL-10 promoter -1082A -1082G       | G/A          | intermediate                                   | 48                | 41.4-58.0 | 40.0-49.6 | 27.7-53.8 | 42.3-53.0 | 52.0              | 39.8-60.9 | na     | 57.1          | na        |
| IL-10 promoter -819C               | C/C          | high/intermediate/low                          | 58                | 57.8-59.0 | 37.0-49.0 | 57.6-69.9 | 33.0-55.1 | 51.0              | 31.6-69.0 | na     | 38.0          | na        |
| IL-10 promoter -819T               | T/T          | low                                            | 9                 | 5.0-6.3   | 7.0-17.0  | 2.7-8.0   | 9.0-17.0  | 10.0              | 6.0-25.0  | na     | 6.0           | na        |
| IL-10 promoter -819T -819C         | C/T          | intermediate/low                               | 34                | 35.1-36.4 | 37.0-48.0 | 27.4-37.3 | 34.6-51.0 | 39.0              | 25.0-57.9 | na     | 56.0          | na        |
| IL-10 promoter -592A               | A/A          | low                                            | 9                 | 5.0       | 7.0-17.0  | 2.7-8.0   | 8.0-17.0  | 10.0              | 6.0-25.0  | na     | 6.0           | na        |
| IL-10 promoter -592C               | C/C          | high/intermediate/low                          | 58                | 59.0      | 37.0-49.0 | 60.2-69.9 | 35.0-55.1 | 51.0              | 31.6-69.0 | na     | 38.0          | na        |
| IL-10 promoter -592A -592C         | C/A          | intermediate/low                               | 34                | 36.0      | 37.0-48.0 | 27.4-37.3 | 34.6-49.0 | 39.0              | 25.0-57.9 | na     | 56.0          | na        |
| TGF- $\beta$ 1 codon 10T           | T/T          | <b>high/</b><br>intermediate (0)/low (0)       | 41                | 34.5      | 27.0-36.7 | 41.0-42.0 | 22.0-28.0 | 28.0              | 28.0-44.0 | na     | na            | na        |
| TGF- $\beta$ 1 codon 10C           | C/C          | <b>intermediate (7)/low (3,1)</b>              | 10                | 13.0      | 16.6-25.0 | 11.0-14.0 | 3.0-22.0  | 25.0              | 7.8-21.1  | na     | na            | na        |
| TGF- $\beta$ 1 codon 10C codon 10T | T/C          | <b>high (35,9)/intermediate (12,5)/</b><br>low | 48                | 52.5      | 45.9-53.1 | 44.0-48.0 | 50.0-75.0 | 47.0              | 42.1-57.8 | na     | na            | na        |
| TGF- $\beta$ 1 codon 25C           | C/C          | low                                            | 0.0               | 0.0       | 0.0-2.0   | 0.6-2.0   | 0.0       | 1.0               | 0.0-5.3   | na     | na            | na        |
| TGF- $\beta$ 1 codon 25G           | G/G          | <b>high (41,4)/intermediate (42,5)</b>         | 84                | 85.0      | 85.0-89.0 | 81.0-83.1 | 88.0-90.0 | 84.0              | 80.0-93.0 | na     | na            | na        |
| TGF- $\beta$ 1 codon 25G codon 25C | G/C          | <b>intermediate (12,5)/low (3,1)</b>           | 16                | 15.0      | 10.0-13.6 | 15.0-18.0 | 10.0-12.0 | 15.0              | 7.0-20.0  | na     | na            | na        |

**Table S2.** Inheritance of the cytokine polymorphism in families.

| household number | genetic relation | PCR household | SARS-CoV-2 (1=PCR pos; 4=PCR neg) | TNF- $\alpha$ | cytokine release potential TNF- $\alpha$ | TGF- $\beta$ 1 | cytokine release potential TGF- $\beta$ 1 | IL-10   | cytokine release potential IL-10 | IL-6 | cytokine release potential IL-6 | IFN- $\gamma$ | cytokine release potential IFN- $\gamma$ |
|------------------|------------------|---------------|-----------------------------------|---------------|------------------------------------------|----------------|-------------------------------------------|---------|----------------------------------|------|---------------------------------|---------------|------------------------------------------|
| LEI_001          | M                | +/- PCR       | 1                                 | G/G           | low                                      | T/T G/G        | high                                      | ACC/ACC | low                              | G/C  | high                            | T/A           | intermediate                             |
| LEI_001          | F2               | +/- PCR       | 1                                 | G/G           | low                                      | T/T G/G        | high                                      | GCC/GCC | high                             | G/C  | high                            | T/T           | high                                     |
| LEI_001          | C1F2M            | +/- PCR       | 1                                 | G/G           | low                                      | T/T G/G        | high                                      | GCC/ACC | intermediate                     | G/G  | high                            | T/T           | high                                     |
| LEI_001          | C2               | +/- PCR       | 1                                 | G/G           | low                                      | T/C G/G        | high                                      | ACC/ACC | low                              | G/C  | high                            | T/A           | intermediate                             |
| LEI_001          | C1               | +/- PCR       | 4                                 | G/G           | low                                      | T/C G/G        | high                                      | GCC/ACC | intermediate                     | G/C  | high                            | T/A           | intermediate                             |
| LEI_007          | MM               | -/- PCR       | 4                                 | G/G           | low                                      | T/C G/C        | intermediate                              | GCC/GCC | high                             | G/G  | high                            | T/A*          | intermediate                             |
| LEI_007          | FM               | -/- PCR       | 4                                 | G/G           | low                                      | T/T G/G        | high                                      | GCC/ACC | intermediate                     | G/G  | high                            | T/A*          | intermediate                             |
| LEI_007          | C1               | -/- PCR       | 4                                 | G/G           | low                                      | T/C G/C        | intermediate                              | GCC/GCC | high                             | G/G  | high                            | T/A           | intermediate                             |
| LEI_007          | C2               | -/- PCR       | 4                                 | G/G           | low                                      | T/C G/C        | intermediate                              | GCC/GCC | high                             | G/G  | high                            | T/A*          | intermediate                             |
| LEI_007          | F                | -/- PCR       | 4                                 | G/G           | low                                      | T/T G/G        | high                                      | ACC/ATA | low                              | G/C  | high                            | T/A           | intermediate                             |
| LEI_007          | C1C1             | -/- PCR       | 4                                 | G/G           | low                                      | T/C G/C        | intermediate                              | GCC/ATA | intermediate                     | G/G  | high                            | A/A           | low                                      |
| LEI_007          | C2C1             | -/- PCR       | 4                                 | G/G           | low                                      | T/C G/C        | intermediate                              | GCC/ATA | intermediate                     | G/G  | high                            | A/A           | low                                      |
| LEI_008          | M                | -/- PCR       | 4                                 | G/G           | low                                      | T/C G/G        | high                                      | GCC/ACC | intermediate                     | G/G  | high                            | T/A           | intermediate                             |
| LEI_008          | F                | -/- PCR       | 4                                 | G/G           | low                                      | C/C G/G        | intermediate                              | GCC/ATA | intermediate                     | G/C  | high                            | T/T           | high                                     |
| LEI_008          | C1               | -/- PCR       | 4                                 | G/G           | low                                      | C/C G/G        | intermediate                              | GCC/ATA | intermediate                     | G/G  | high                            | T/T           | high                                     |
| LEI_033          | M                | +/+ PCR       | 1                                 | G/G           | low                                      | T/T G/G        | high                                      | GCC/ACC | intermediate                     | G/C* | high                            | T/A           | intermediate                             |
| LEI_033          | F                | +/+ PCR       | 1                                 | G/G           | low                                      | T/T G/G        | high                                      | GCC/ACC | intermediate                     | G/C* | high                            | A/A           | low                                      |
| LEI_033          | C1               | +/+ PCR       | 1                                 | G/G           | low                                      | T/T G/G        | high                                      | GCC/GCC | high                             | G/C* | high                            | T/A           | intermediate                             |
| LEI_039          | M                | +/+ PCR       | 1                                 | G/G           | low                                      | T/C G/G        | high                                      | ACC/ATA | low                              | G/C  | high                            | A/A           | low                                      |
| LEI_039          | F                | +/+ PCR       | 1                                 | G/G           | low                                      | T/C G/C        | intermediate                              | ATA/ATA | low                              | G/C  | high                            | T/A           | intermediate                             |
| LEI_039          | C1               | +/+ PCR       | 1                                 | G/G           | low                                      | T/C G/G        | high                                      | ATA/ATA | low                              | G/G  | high                            | A/A           | low                                      |
| LEI_041          | MM               | +/- PCR       | 1                                 | G/G           | low                                      | T/C G/G        | high                                      | ATA/ATA | low                              | G/C* | high                            | T/A           | intermediate                             |
| LEI_041          | FM               | +/- PCR       | 4                                 | G/G           | low                                      | T/C G/G        | high                                      | GCC/ATA | intermediate                     | G/C* | high                            | T/T           | high                                     |
| LEI_041          | C1               | +/- PCR       | 1                                 | G/G           | low                                      | T/T G/G        | high                                      | GCC/ATA | intermediate                     | G/C* | high                            | T/T           | high                                     |
| LEI_041          | F                | +/- PCR       | 1                                 | G/G           | low                                      | T/C G/G        | high                                      | GCC/ACC | intermediate                     | G/G  | high                            | T/T           | high                                     |
| LEI_041          | C1C1             | +/- PCR       | 4                                 | G/G           | low                                      | T/C G/G        | high                                      | ACC/ATA | low                              | G/C  | high                            | T/T           | high                                     |
| LEI_041          | C2C1             | +/- PCR       | 1                                 | G/G           | low                                      | T/C G/G        | high                                      | ACC/ATA | low                              | G/G  | high                            | T/T           | high                                     |
| LEI_043          | M                | +/- PCR       | 4                                 | G/G           | low                                      | T/T G/G        | high                                      | GCC/ATA | intermediate                     | G/C  | high                            | A/A           | low                                      |
| LEI_043          | F                | +/- PCR       | 1                                 | G/G           | low                                      | T/C G/C        | intermediate                              | GCC/ACC | intermediate                     | G/G  | high                            | T/T           | high                                     |
| LEI_043          | C1               | +/- PCR       | 4                                 | G/G           | low                                      | T/C G/C        | intermediate                              | ACC/ATA | low                              | G/C  | high                            | T/A           | intermediate                             |

<sup>1</sup> Blue colour shows the genotype inherited from the mother (M) and yellow the genotype not inherited from the mother. Red and green colour indicate the genotype inherited from the father (F) and black and pink colour the genotype not inherited from the father. Green C1 and C2: children of M and F, MM: mother of the mother; FM: Father of the mother, C1C1: first child from C1, C2C1: second child from C1. F2: father, who is not genetically related to all children, C1F2M: first child of F2 and M. \* marks polymorphisms in which the inheritance from mother or father to the children cannot be clearly stated.
